# Supplementary material for: A Randomized Controlled Exploratory Evaluation of Standardized Ayurvedic Formulations in Symptomatic Osteoarthritis Knees: A Government of India NMITLI Project
Source: Hindawi journal article supplement (doi:10.1155/2011/724291), 2010-10-11
Supplement: f1 [file 724291.f1.pdf]

**Supplementary Data: Adverse Event episodes in patients by treatment groups**

(This data is presented as histograms as Figure 4.)

**Number (percent) of Adverse Event episodes in patients (n=245) by treatment groups- Ayurvedic arms code A-E, glucosamine (GLU) and placebo (PLB)**

| Adverse Event         | A<br>(n=35) | B<br>(n=35) | C<br>(n= 35) | D<br>(n=35) | E<br>(n=35) | GLU<br>(n=35) | PLB<br>(n=35) |
|-----------------------|-------------|-------------|--------------|-------------|-------------|---------------|---------------|
| Epigastric discomfort | 6 (17.1)    | 13 (37.1)   | 4 (11.4)     | 3 (8.6)     | 11 (31.4)   | 7 (20)        | 9 (25.7)      |
| Diffuse Pain abdomen  | 4 (11.4)    | 4 (11.4)    | 2 (5.7)      | 2 (5.7)     | 2 (5.7)     | 4 (11.4)      | 4 (11.4)      |
| Anorexia              | -           | 1(2.9)      | 1 (2.9)      | 2 (5.7)     | 1 (2.9)     | 1 (2.9)       | 1 (2.9)       |
| Nausea                | 6 (17.1)    | 4 (11.4)    | 5 (14.2)     | 3 (8.6)     | 5 (14.2)    | 6 (17.1)      | 4 (11.4)      |
| Vomiting              | 1 (2.9)     | 1 (2.9)     | -            | -           | 3 (8.6)     | 1 (2.9)       | -             |
| Diarrhoea             | 3 (8.6)     | 1 (2.9)     | 1 (2.9)      | -           | 2 (5.7)     | 1 (2.9)       | 2 (5.7)       |
| Constipation          | 1 (2.9)     | 3 (8.6)     | 1 (2.9)      | -           | -           | 2 (5.7)       | 3 (8.6)       |
| Oral Ulcers           | 1 (2.9)     | 1 (2.9)     | -            | -           | 1 (2.9)     | -             | 1 (2.9)       |
| Skin Rash & Itching   | -           | 3 (8.6)     | 4 (11.4)     | 3 (8.6)     | 3 (8.6)     | 1 (2.9)       | 6 (17.1)      |
